# Supplementary material for: Causal Analysis of Health Interventions and Environments for Influencing the Spread of COVID-19 in the United States of America
Source: Frontiers journal article supplement (doi:10.3389/fams.2020.611805), 2021-01-24
Supplement: Table_1.XLSX [file Table_1.XLSX]

## Sheet: Sheet1
Table S1. P-values for testing 18 temporal potential causes of the number of new cases of COVID-19 across 50 states in the US.
Risk Factor	AK	AL	AR	AZ	CA	CO	CT	DE	FL	GA	HI	IA	ID	IL	IN	KS	KY	LA	MA	MD	ME	MI	MN	MO	MS
Miles/person	2.84x10-5	2.38x10-5	4.45x10-5	7.25x10-5	7.73x10-8	5.16x10-11	9.55x10-10	4.33x10-10	3.06x10-2	2.79x10-4	9.49x10-3	7.28x10-9	1.3x10-3	4.86x10-4	1.79x10-5	9.41x10-19	2.48x10-12	4.22x10-15	3.21x10-5	1.38x10-4	8.16x10-11	1.63x10-4	5.83x10-5	7.75x10-4	1.59x10-6
Population	5.42x10-4	2.24x10-4	2.97x10-4	1.91x10-4	1.62x10-6	2.82x10-13	2.4x10-12	2.83x10-12	3.62x10-2	3.2x10-4	1.96x10-2	4.02x10-8	2.63x10-3	5.16x10-5	1.53x10-5	1.48x10-14	2.95x10-10	3.82x10-14	1.56x10-6	4.59x10-6	1.71x10-12	4.53x10-6	1.26x10-4	1.59x10-3	9.67x10-6
% change in consumption	7.18x10-5	7.73x10-5	2.63x10-3	2.17x10-4	1.42x10-5	1.57x10-12	4.4x10-20	4.36x10-10	5.48x10-2	8.69x10-4	3.12x10-2	5.29x10-6	1.96x10-2	1.76x10-4	2.58x10-3	5.02x10-14	1.75x10-10	4.44x10-13	2.5x10-9	2.71x10-5	1.2x10-11	1.47x10-6	6.23x10-5	1.74x10-2	7.99x10-6
Social distancing index	2.42x10-3	1.72x10-3	3.1x10-3	5.93x10-4	7.96x10-6	2.25x10-9	5.01x10-19	7.02x10-13	9.11x10-2	3.44x10-4	3.31x10-2	4.71x10-5	4.7x10-3	4.61x10-4	1.04x10-3	3.41x10-12	4.27x10-8	7.3x10-13	5.95x10-9	5.7x10-6	1.6x10-8	1.2x10-7	4.49x10-3	5.48x10-3	1.27x10-4
Unemployment claims	1.38x10-3	1.63x10-3	2.44x10-3	1.08x10-3	4.26x10-5	1.02x10-8	1.02x10-18	1.67x10-9	6.85x10-2	2.3x10-3	3.08x10-2	4.82x10-5	6.85x10-3	8.04x10-4	1.1x10-3	2.07x10-10	2.17x10-7	8.33x10-11	6.81x10-7	1.32x10-4	1.95x10-7	3.83x10-7	4.03x10-3	6.46x10-3	2.67x10-4
Unemployment rate	2.8x10-4	3.38x10-4	1.05x10-4	2.42x10-4	3.73x10-8	3.68x10-12	2.1x10-11	4.08x10-15	2.63x10-2	4.18x10-4	2.92x10-2	2.59x10-9	4.66x10-3	5.27x10-6	3.17x10-5	2.71x10-14	6.28x10-8	3.71x10-12	5.04x10-6	9.15x10-8	7.15x10-18	8.55x10-5	1.17x10-6	3.63x10-3	3.42x10-5
% working from home	8.29x10-4	1.99x10-5	3.34x10-5	2.21x10-5	5.22x10-7	1.81x10-17	2.15x10-13	1.37x10-12	3.71x10-2	2.37x10-4	2.34x10-3	5.88x10-10	4.86x10-4	6.56x10-6	6.64x10-8	1.03x10-16	6.43x10-15	1.58x10-19	4.18x10-7	8.53x10-8	1.26x10-11	1.13x10-9	2.14x10-5	3.63x10-4	9.2x10-8
Active cases/1000 people	3.24x10-7	5.4x10-8	4.49x10-14	7.12x10-7	2.29x10-18	1.65x10-14	3.67x10-17	2.44x10-14	7.2x10-2	2.76x10-10	1.31x10-8	5.07x10-14	7.54x10-9	2.3x10-5	1.12x10-9	1.81x10-32	1.35x10-25	2.99x10-18	3.55x10-8	1.54x10-6	6.76x10-13	2.64x10-5	9.01x10-7	4.56x10-7	2.8x10-11
Testing capacity	2.03x10-3	2.1x10-3	1.38x10-3	4.08x10-4	8.98x10-5	1.08x10-11	5.46x10-25	9.84x10-9	7.16x10-2	2.41x10-3	2.12x10-2	1.32x10-6	8.3x10-4	2.14x10-5	3.59x10-3	1.94x10-14	4.82x10-8	3.89x10-10	5.5x10-6	7.4x10-4	1.7x10-14	2.22x10-4	9.92x10-7	4.69x10-3	1.94x10-5
Tests done/1000 people	6.27x10-9	1.14x10-6	7.22x10-11	7.03x10-5	1.23x10-14	5.08x10-9	5.69x10-10	1.15x10-8	3.63x10-2	2.46x10-9	3.78x10-5	3.14x10-10	1.01x10-8	1.48x10-3	5.15x10-6	1.21x10-32	2.17x10-25	2.82x10-16	4.84x10-5	1.05x10-3	7.43x10-7	1.6x10-4	7.55x10-5	2.42x10-9	2.16x10-12
Imported COVID cases	2.02x10-6	1.37x10-6	1.77x10-6	5.06x10-4	1.35x10-16	1.08x10-8	1.12x10-16	3.72x10-13	4.51x10-1	1.72x10-7	7.42x10-6	3.65x10-11	4.53x10-10	1.25x10-3	3.41x10-7	3.51x10-30	4.3x10-26	9.08x10-18	7.2x10-7	2.58x10-8	1.28x10-14	3.9x10-4	2.84x10-5	6.5x10-6	1.41x10-9
Retail	3.13x10-4	3.27x10-3	2.63x10-3	1.42x10-3	1.32x10-5	7.37x10-8	1.95x10-24	1.32x10-11	9.58x10-2	4.42x10-3	2.91x10-2	2.4x10-5	1.99x10-3	5.92x10-4	2.48x10-3	5.2x10-10	3.51x10-7	2.99x10-11	3.2x10-10	9.66x10-6	2.02x10-9	1.3x10-5	2.74x10-3	8.73x10-3	3.71x10-4
Grocery	7.53x10-4	3.11x10-4	2.33x10-3	2.74x10-4	1.53x10-5	1.42x10-11	8.27x10-22	4.16x10-12	1.15x10-1	5.76x10-4	2x10-2	4x10-6	3.84x10-4	1.51x10-5	5.06x10-5	1.59x10-14	4.52x10-8	2.23x10-14	8.78x10-8	1.86x10-6	4.34x10-10	2.54x10-8	7.71x10-5	2.97x10-3	1.39x10-5
Parks	2.8x10-4	4.51x10-4	2.91x10-5	5.62x10-3	2.41x10-8	1.01x10-9	6.21x10-10	3.55x10-8	8.18x10-2	3.14x10-2	1.88x10-2	4.87x10-7	4.61x10-5	6.35x10-2	2.33x10-2	2.52x10-13	1.19x10-8	5.87x10-14	3.02x10-5	5.1x10-2	7.77x10-7	1.43x10-3	1.02x10-4	7.31x10-3	1.21x10-4
Transit	5.58x10-4	2.85x10-4	5.36x10-4	2.99x10-4	5.77x10-6	1.14x10-12	1.22x10-22	9.88x10-15	6.37x10-2	3.26x10-4	2.25x10-2	9.89x10-8	6.87x10-5	2.21x10-7	1.8x10-5	3.14x10-16	3.11x10-8	4.33x10-11	1.19x10-8	8.31x10-9	6.3x10-11	1.07x10-7	2.25x10-4	4.16x10-3	1.42x10-5
Workplaces	4.69x10-4	4.1x10-4	7.84x10-5	9.3x10-6	1.49x10-5	1.48x10-17	3.19x10-14	7.21x10-15	9.59x10-3	2.12x10-5	1.84x10-2	2.01x10-9	7.14x10-3	5.82x10-8	5.35x10-7	1.35x10-11	2.98x10-10	1.66x10-12	2.76x10-8	6.35x10-9	9.8x10-15	1.16x10-10	3.29x10-5	1.05x10-3	6x10-6
Residential	6.31x10-4	1.07x10-3	7.28x10-4	6.5x10-5	7x10-5	4.39x10-14	1.43x10-16	3.64x10-15	1.66x10-2	3.64x10-4	1.58x10-2	4.18x10-7	1.23x10-2	1.66x10-7	1.85x10-5	3.46x10-10	1.62x10-8	5.2x10-11	3.28x10-10	1.86x10-8	4.91x10-12	2.46x10-8	1.19x10-4	4.73x10-3	7.74x10-5
Protest	9.62x10-3	7.17x10-1	3.44x10-2	3.79x10-1	3.59x10-1	6.5x10-1	3.58x10-2	5.83x10-2	9.61x10-1	7.98x10-3	1.27x10-2	1.34x10-1	1.98x10-2	5.15x10-1	9.07x10-1	2.63x10-4	1.16x10-4	4.44x10-2	1.57x10-3	3.11x10-1	8.03x10-2	1.72x10-2	9.88x10-1	8.68x10-3	2.32x10-1
Risk Factor	MT	NC	ND	NE	NH	NJ	NM	NV	NY	OH	OK	OR	PA	RI	SC	SD	TN	TX	UT	VA	VT	WA	WI	WV	WY
Miles/person	5.79x10-4	9.17x10-6	1.1x10-4	1.39x10-6	3.77x10-14	4.66x10-3	1.43x10-8	8.49x10-4	9.06x10-2	2.55x10-6	1.39x10-4	3.01x10-5	1.14x10-3	3.07x10-23	4.7x10-3	3.65x10-8	5.86x10-6	2.33x10-3	1.24x10-4	3.21x10-5	4.81x10-14	3.29x10-11	1.11x10-6	1.35x10-9	2.67x10-13
Population	1.16x10-3	2.52x10-4	5.41x10-4	4.35x10-7	1.73x10-18	1.24x10-3	2.35x10-8	4.41x10-3	6.09x10-2	9.37x10-6	4.88x10-4	2.49x10-4	1.53x10-5	3.46x10-25	8.52x10-3	4.16x10-8	2.92x10-5	5.12x10-3	7.03x10-4	2.67x10-5	6.82x10-16	1.03x10-10	2.76x10-5	6.65x10-8	1.72x10-11
% change in consumption	1.41x10-4	1.08x10-4	1.13x10-4	2.96x10-3	3.64x10-19	9.63x10-7	1.56x10-5	1.19x10-2	1.8x10-3	6.58x10-5	3.9x10-4	1.28x10-4	1.98x10-7	2.29x10-26	8.32x10-3	2.07x10-8	1.14x10-4	4.74x10-3	2.28x10-4	4.43x10-5	7.46x10-19	2.31x10-9	9.84x10-5	4.61x10-10	4.17x10-10
Social distancing index	6.45x10-3	3.48x10-3	9.82x10-3	9.51x10-6	2.85x10-19	1.55x10-5	1.29x10-6	1.7x10-2	3.96x10-2	3.66x10-4	3.89x10-3	2.07x10-3	1.72x10-7	3.84x10-27	3.73x10-2	5.67x10-5	2.74x10-4	8.77x10-3	3.99x10-2	4.04x10-4	1.59x10-19	1.33x10-8	2.85x10-3	4.97x10-6	1.92x10-9
Unemployment claims	3.28x10-3	4.22x10-3	4.29x10-3	1.05x10-4	3.61x10-16	2.15x10-7	1.92x10-5	1.43x10-2	1.08x10-3	6.26x10-4	2.47x10-3	2.98x10-3	1.27x10-4	6.82x10-24	2.53x10-2	4.97x10-6	3.93x10-4	1.67x10-2	8.18x10-3	1.33x10-3	2.07x10-32	1.44x10-7	9.21x10-4	1.77x10-6	1.03x10-8
Unemployment rate	2.68x10-3	1.46x10-4	1.35x10-3	6.1x10-10	4.83x10-26	2.77x10-3	7.49x10-9	7.22x10-3	1.72x10-1	3.5x10-5	4.94x10-4	2.98x10-4	4.31x10-5	7.91x10-27	6.72x10-3	3.81x10-8	4.81x10-5	4.37x10-3	1.81x10-3	5.62x10-8	3.75x10-14	1.57x10-9	2.64x10-5	2.45x10-6	8.02x10-12
% working from home	1.15x10-4	1.17x10-5	1.34x10-5	2.38x10-8	1.36x10-16	2.8x10-4	7.24x10-13	7.52x10-5	3.37x10-2	6.59x10-8	5.17x10-4	1.7x10-5	3.15x10-7	4.36x10-25	4.18x10-3	1.48x10-9	1.99x10-6	2.41x10-3	3.51x10-5	2.02x10-7	1.76x10-16	1.89x10-17	1.48x10-6	1.51x10-12	2.41x10-15
Active cases/1000 people	4.85x10-9	7.49x10-14	3.35x10-13	9.21x10-9	6.18x10-27	9.48x10-4	5.68x10-13	2.9x10-5	5.76x10-1	6.42x10-10	1.55x10-9	3.87x10-12	1.13x10-4	1.2x10-26	1.58x10-4	3.91x10-9	3.45x10-12	3.05x10-6	2.04x10-7	2.08x10-8	6.89x10-15	2.65x10-21	5.19x10-12	1.53x10-16	2.13x10-21
Testing capacity	3.62x10-3	1.7x10-3	3.43x10-5	5.55x10-9	1.35x10-22	1.23x10-4	1.38x10-9	1.16x10-2	3.02x10-2	8.43x10-4	1.9x10-3	1.27x10-3	2.8x10-3	7.04x10-24	1.73x10-2	1.14x10-7	1.76x10-4	1.25x10-2	4.91x10-3	1.04x10-4	1.52x10-23	1.39x10-8	1.62x10-4	5.41x10-7	5.99x10-10
Tests done/1000 people	1.87x10-11	1.32x10-7	4.57x10-11	2.66x10-6	1.88x10-12	3.82x10-3	1.25x10-8	7.97x10-6	1.02x10-1	3.4x10-7	4.14x10-10	6.15x10-11	3.2x10-3	6.8x10-23	1.01x10-3	4.46x10-7	3.7x10-11	1.09x10-5	8.73x10-6	5.47x10-5	5.7x10-13	1.22x10-18	1.36x10-10	2.13x10-16	1.46x10-19
Imported COVID cases	2.68x10-8	1.75x10-6	6.83x10-9	3.81x10-7	9.04x10-32	5.95x10-4	1.97x10-9	2.36x10-9	2.56x10-1	1x10-6	1.54x10-8	4.44x10-10	1.42x10-4	1.02x10-27	3.13x10-3	2.67x10-7	4.41x10-12	1.14x10-4	1.57x10-2	9.81x10-8	2.45x10-13	1.5x10-14	3.43x10-6	9.61x10-13	5.39x10-19
Retail	2.69x10-4	4.52x10-3	6.11x10-3	1.5x10-4	4.8x10-19	3.36x10-7	3.45x10-5	2.06x10-2	2.85x10-2	2.79x10-3	4.09x10-3	5.62x10-3	4.6x10-5	7.67x10-26	3.56x10-2	1.25x10-7	6.14x10-4	2.17x10-2	6.99x10-2	8.36x10-4	1.36x10-20	3.18x10-8	1.34x10-3	4.44x10-6	5.38x10-14
Grocery	2.29x10-4	2.64x10-4	3.66x10-4	6.21x10-5	1.72x10-22	9.04x10-6	2.22x10-8	1.38x10-2	2.03x10-1	9.9x10-6	2.38x10-3	8.94x10-5	4.34x10-6	3.7x10-25	1.12x10-2	1.32x10-4	4.46x10-5	4.1x10-3	7.19x10-4	9.78x10-5	5.58x10-20	5.59x10-9	2.42x10-5	1.11x10-7	3.28x10-13
Parks	1.59x10-7	8.59x10-3	4.91x10-4	3.3x10-5	3.88x10-12	3.97x10-3	2.09x10-7	1.38x10-2	4.1x10-2	5.6x10-4	4.38x10-3	1.57x10-8	1.9x10-3	3.87x10-23	1.55x10-2	3.86x10-6	1.71x10-5	6.28x10-3	6.82x10-7	7.84x10-3	3.09x10-12	1.15x10-15	3.19x10-5	1.58x10-6	1.63x10-19
Transit	1.62x10-4	1.2x10-3	3.22x10-3	4.02x10-7	1.28x10-22	9.18x10-6	1.7x10-5	1.16x10-2	2.01x10-2	2.96x10-4	4.18x10-4	8.8x10-4	9.3x10-9	1.9x10-27	8.54x10-3	3.29x10-6	3.25x10-4	7.33x10-3	2.04x10-3	1.86x10-5	3.02x10-19	5.09x10-10	8.95x10-5	7.37x10-9	1.99x10-13
Workplaces	4.62x10-4	1.17x10-4	2.3x10-4	2.04x10-7	1.41x10-23	2.25x10-5	4.41x10-8	4.5x10-3	3.54x10-3	2.84x10-5	4.17x10-5	1.46x10-4	4.21x10-9	1.07x10-25	3.22x10-3	3.89x10-12	6.09x10-5	2.64x10-3	2.93x10-5	7.82x10-7	2.19x10-19	1.06x10-11	6.61x10-8	1.18x10-7	1.91x10-9
Residential	1.37x10-3	2.84x10-4	1.59x10-3	4.47x10-6	2.97x10-24	1.12x10-6	3.44x10-7	6.19x10-3	9.57x10-5	2.76x10-4	3.78x10-4	5.83x10-4	2.07x10-7	1.09x10-25	6.16x10-3	3.46x10-9	1.55x10-4	7.17x10-3	2.09x10-4	1.38x10-5	3.14x10-22	2.2x10-9	5.52x10-6	2.04x10-6	5.55x10-8
Protest	2.1x10-1	4.05x10-1	2.64x10-1	6.11x10-2	1.08x10-3	1.68x10-1	9.13x10-2	2.93x10-1	7.75x10-1	7.55x10-1	3.11x10-1	8.78x10-3	1	2.05x10-2	2.49x10-1	2.42x10-1	2.34x10-3	6.6x10-1	7.59x10-1	1.64x10-1	1.57x10-1	9.29x10-1	5.11x10-1	9.66x10-1	8.3x10-1
