# Supplementary material for: Causal Analysis of Health Interventions and Environments for Influencing the Spread of COVID-19 in the United States of America
Source: Frontiers journal article supplement (doi:10.3389/fams.2020.611805), 2021-01-24
Supplement: Table_2.XLSX [file Table_2.XLSX]

## Sheet: t2statistic-value-new_cases_110
Table S 2. Values of statistics for testing 18 temporal potential causes of the number of new cases of COVID-19 across 50 states in the US.
Risk Factor	AK	AL	AR	AZ	CA	CO	CT	DE	FL	GA	HI	IA	ID	IL	IN	KS	KY	LA	MA	MD	ME	MI	MN	MO	MS
Miles/person	18.52	18.8968	17.569	16.5363	31.5368	49.1965	42.0152	45.0498	4.7513	13.7689	6.88454	37.0949	10.7498	12.6461	19.4973	99.6106	57.0664	74.574	18.294	15.2119	48.1194	14.8581	17.0008	11.7225	24.7551
Population	12.4361	14.228	13.6507	14.5358	24.6874	62.79	57.1981	58.5558	4.45809	13.4869	5.55713	33.0821	9.36532	17.2456	19.8228	70.9401	44.8688	68.3864	24.8594	22.4136	58.1008	22.4097	15.3944	10.3084	20.8184
% change in consumption	16.5735	16.4182	9.32175	14.2795	19.977	58.2056	109.586	45.0302	3.73894	11.4862	4.72038	22.114	5.56511	14.7069	9.35507	67.5579	46.1723	61.6907	39.8133	18.6083	52.9992	24.8692	16.8639	5.77374	21.2295
Social distancing index	9.48202	10.1526	9.0057	12.2485	21.2143	39.8801	101.75	62.4759	2.88784	13.3408	4.61634	17.4473	8.24214	12.7528	11.1344	56.2289	32.9387	60.358	37.7239	21.946	35.252	30.4844	8.29266	7.91515	15.3851
Unemployment claims	10.5854	10.2551	9.46971	11.064	17.6457	36.2723	99.4933	41.6032	3.3609	9.57747	4.74586	17.4003	7.52551	11.6408	11.0175	45.7541	29.2037	48.0651	26.7059	15.3034	29.4676	27.8579	8.50077	7.60416	13.8704
Unemployment rate	13.7675	13.3903	15.7722	14.0535	33.2169	55.9787	51.5632	77.6685	5.02293	12.9516	4.83481	39.5681	8.25839	22.1061	18.2822	69.2629	32.0493	56.0587	22.2751	31.1642	93.4494	16.1808	25.4166	8.70156	18.1245
% working from home	11.5881	19.2728	18.1701	19.0368	27.1991	90.3606	63.6514	60.5895	4.41466	14.1038	9.54686	43.1729	12.7356	21.6316	31.9184	85.2711	73.2902	105.448	27.8052	31.3248	52.8881	41.4386	19.1164	13.2431	31.1842
Active cases/1000 people	28.3153	32.4139	67.8651	26.5075	96.5548	70.574	88.4735	72.2676	3.27703	44.9689	35.7334	67.5307	37.6585	18.951	41.5996	219.987	154.06	96.1449	33.488	24.8115	60.5639	18.6415	26.0067	27.5412	50.8276
Testing capacity	9.82971	9.75954	10.5769	12.9992	16.0925	53.1881	149.113	37.1652	3.2872	9.48953	5.41415	25.166	11.6533	19.1035	8.72368	70.1902	32.6621	44.2225	22.084	11.8081	70.6384	14.2238	25.7918	8.21076	19.3294
Tests done/1000 people	37.4736	25.4873	48.3898	16.6016	71.3034	37.9284	43.2822	36.7816	4.45423	39.6409	17.9166	44.7155	36.9423	10.4405	22.174	221.832	152.266	82.4023	17.4244	11.1177	26.4495	14.8952	16.4617	39.7561	57.4759
Imported COVID cases	24.2266	25.0842	24.5138	12.5677	84.2546	36.1301	85.1303	64.2869	0.569853	29.7089	21.3889	50.1121	44.7085	10.7672	28.1858	196.657	158.416	92.7155	26.5803	34.0929	71.4264	13.0831	18.5156	21.6762	41.0663
Retail	13.5421	8.8996	9.3227	10.5133	20.1226	31.663	144.385	54.3175	2.80525	8.32311	4.84301	18.8689	9.91286	12.2519	9.43757	43.4734	28.1183	50.6636	44.8715	20.8061	40.1953	20.1477	9.2412	7.03957	13.2017
Grocery	11.7784	13.5588	9.55722	13.803	19.8075	52.485	122.886	57.4801	2.51075	12.3071	5.51566	22.7248	13.2181	19.8422	17.2967	70.7486	32.8074	69.8842	31.3774	24.3861	43.952	34.0581	16.4197	9.08694	20.0472
Parks	13.7703	12.8073	18.4629	7.86476	34.2389	41.8101	43.0693	34.0348	3.0639	4.70739	5.62849	27.3838	17.6448	3.48755	5.24276	63.1569	35.9292	67.1966	18.4231	3.86228	26.3471	10.5045	15.8469	7.37277	15.4868
Transit	12.3788	13.7366	12.4559	13.6287	21.9099	59.0695	129.513	74.98	3.48232	13.4501	5.30678	31.0021	16.7983	29.1342	19.4862	81.9806	33.6761	49.7237	36.0733	36.7592	48.769	30.7441	14.2116	8.44127	19.987
Workplaces	12.7268	12.9999	16.3844	20.8793	19.877	90.9785	68.8836	75.934	6.86256	19.1252	5.66707	40.1803	7.44537	32.1891	27.1707	52.6647	44.8489	58.1818	34.0772	37.3991	72.1869	47.0262	18.2055	11.1143	21.849
Residential	12.1322	11.0834	11.843	16.7633	16.6112	67.8562	84.399	78.0207	5.85308	13.2278	5.94963	27.7282	6.42933	29.79	19.4216	44.4775	35.2092	49.2558	44.8131	34.8644	55.3269	34.1278	15.5259	8.19565	16.415
Protest	13.9883	0.13722	7.4319	0.813317	0.879325	0.21531	5.31729	15.6739	0.00245288	9.55005	14.3773	2.4675	11.3754	0.441343	0.0140589	30.2209	23.3485	4.87833	14.1131	1.15147	3.64841	6.59746	0.000233876	8.46262	1.84757
Risk Factor	MT	NC	ND	NE	NH	NJ	NM	NV	NY	OH	OK	OR	PA	RI	SC	SD	TN	TX	UT	VA	VT	WA	WI	WV	WY
Miles/person	12.3055	20.9102	15.7323	25.032	68.2782	8.20076	35.4949	11.5362	2.89678	23.6989	15.2008	18.3801	10.9518	133.64	8.20567	33.3606	21.8834	9.55278	15.4343	18.248	67.7494	49.6517	25.5207	41.1459	63.5986
Population	10.9276	13.9758	12.4748	27.625	97.562	10.746	34.3369	8.32769	3.55941	20.8718	12.6497	13.9989	19.8303	149.897	7.08266	33.0583	18.4508	8.04248	11.9169	18.6364	79.8143	46.8438	18.5651	31.9167	52.4468
% change in consumption	15.1747	15.7172	15.6911	9.09282	102.459	25.6536	19.7804	6.46286	10.0548	16.7457	13.0975	15.36	29.4117	160.157	7.12632	34.6897	15.6003	8.18831	14.1896	17.5696	100.491	39.3811	15.9031	43.7734	44.3225
Social distancing index	7.60805	8.77728	6.8323	20.8403	103.235	19.6782	25.2165	5.8066	4.29937	13.2219	8.5691	9.78556	29.7408	167.08	4.40325	17.0755	13.807	7.02779	4.29	13.0222	105.428	35.292	9.16089	22.2481	40.5457
Unemployment claims	8.89857	8.41012	8.39926	15.7697	81.4671	28.9694	19.3452	6.12724	11.0639	12.1424	9.44412	9.07944	15.3838	138.997	5.0946	22.2774	13.0802	5.83676	7.16224	10.6452	219.993	29.8638	11.3725	24.5154	36.4881
Unemployment rate	9.28815	15.0894	10.6515	43.0518	157.631	9.1887	37.0276	7.3949	1.88395	18.0649	12.625	13.6345	17.6352	164.257	7.52704	33.2628	17.3972	8.34433	10.049	32.2885	68.4336	40.2849	18.6534	23.7905	54.4509
% working from home	15.5966	20.383	20.2107	34.2839	84.3363	13.7029	60.3238	16.4669	4.58299	31.9207	12.5331	19.596	28.3648	149.037	8.42567	41.0038	24.24	9.48948	18.0701	29.3565	83.7888	88.1853	24.8842	58.3753	76.9353
Active cases/1000 people	38.0885	66.3204	63.1904	36.5168	165.584	11.2779	60.9695	18.4647	0.314511	42.9273	40.8384	55.7967	15.6215	162.645	14.9245	38.6573	56.1474	23.2948	29.3608	34.6001	73.1824	115.148	55.0354	84.1002	121.434
Testing capacity	8.70917	10.1678	18.1879	37.7168	128.698	15.37	41.0963	6.50565	4.77596	11.5496	9.9588	10.741	9.20291	138.885	5.77928	30.7324	14.712	6.36522	8.12475	15.8009	136.924	35.1872	14.8726	27.148	43.4173
Tests done/1000 people	51.8696	30.3126	50.0607	23.6061	57.7428	8.57704	35.8068	21.2186	2.71002	28.1801	44.0683	48.716	8.94538	130.85	11.1813	27.6206	50.0402	20.5487	21.039	17.1315	61.0204	96.2332	46.7245	83.1251	107.103
Imported COVID cases	34.0434	24.5197	37.5495	27.9228	212.132	12.198	40.2246	39.766	1.30067	25.7554	35.344	43.8014	15.1496	172.319	8.97984	28.7806	55.5053	15.5956	5.95712	31.0038	63.2927	69.5229	23.039	59.5671	102.83
Retail	13.8491	8.27916	7.72379	15.0393	101.585	27.9771	18.1001	5.46155	4.87682	9.20779	8.47344	7.86626	17.499	155.546	4.4843	30.5056	12.1816	5.36709	3.32655	11.567	113.441	33.2874	10.6292	22.4933	68.0493
Grocery	14.1829	13.8782	13.2644	16.8639	127.848	20.8196	34.4687	6.19076	1.63264	20.7535	9.51857	16.102	22.5439	149.646	6.56662	15.3152	17.5578	8.46412	11.8725	15.9201	108.811	37.3032	18.8396	30.7294	63.03
Parks	29.9354	7.06754	12.6689	18.1897	55.8394	8.50341	29.2972	6.19648	4.23863	12.3666	8.34246	35.234	9.9568	132.828	5.97306	22.8278	19.5839	7.65609	26.6413	7.24011	56.537	76.5428	18.2553	24.756	106.745
Transit	14.8888	10.845	8.95026	27.799	128.868	20.7877	19.597	6.50293	5.50652	13.6489	12.9577	11.4623	36.5155	169.855	7.07792	23.176	13.459	7.36498	9.81862	19.4057	103.367	42.9742	16.1008	37.0672	64.4081
Workplaces	12.7558	15.5443	14.2128	29.3364	136.664	18.897	32.8661	8.28669	8.74644	18.5087	17.7117	15.0934	38.4038	154.272	8.92839	56.0366	16.9061	9.31258	18.4548	26.3087	104.39	52.4792	31.8948	30.6009	40.5537
Residential	10.5884	13.734	10.3216	22.473	142.276	25.3188	28.1643	7.68373	15.9619	13.796	13.1635	12.2819	29.3114	154.203	7.69236	38.9523	14.9765	7.40513	14.3644	20.0422	126.225	39.4962	22.0058	24.1982	32.5
Protest	1.90538	0.726696	1.8798	4.26843	22.327	2.04967	3.42409	1.21808	0.0839505	0.100148	1.11155	8.26977	1.61478e-07	8.88512	1.45408	1.88354	12.5367	0.199325	0.0987188	2.08666	3.03267	0.00811127	0.452685	0.00198483	0.0547752
