# Supplementary material for: Causal Analysis of Health Interventions and Environments for Influencing the Spread of COVID-19 in the United States of America
Source: Frontiers journal article supplement (doi:10.3389/fams.2020.611805), 2021-01-24
Supplement: Table_3.XLSX [file Table_3.XLSX]

## Sheet: Table S5
Table S3. P-values for testing 18 temporal potential causes of the number of deaths of COVID-19 across 50 states in the US.
Risk Factor	AK	AL	AR	AZ	CA	CO	CT	DE	FL	GA	HI	IA	ID	IL	IN	KS	KY	LA	MA	MD	ME	MI	MN	MO	MS
Miles/person	2.05x10-21	2.09x10-15	9.83x10-19	2.53x10-15	3.99x10-8	3.83x10-22	6.73x10-7	1.13x10-3	5.52x10-6	6.24x10-12	3.63x10-16	5.89x10-9	2.21x10-10	5.55x10-6	1.66x10-9	3.13x10-34	3.09x10-19	5.9x10-12	1.16x10-3	1.25x10-2	1.44x10-17	1.4x10-1	8.32x10-5	4.44x10-15	4.37x10-13
Population	6.41x10-21	1.04x10-14	6.84x10-16	3.54x10-14	9.69x10-8	1.52x10-23	4.15x10-8	2.78x10-4	1.52x10-5	8.28x10-13	1.28x10-16	3.42x10-10	6.13x10-10	1.11x10-7	1.93x10-11	7.66x10-37	2.68x10-21	3.04x10-15	9.19x10-5	1.64x10-3	4.68x10-19	7.14x10-2	4.68x10-6	1.77x10-16	6x10-12
% change in consumption	5.55x10-21	9.98x10-15	1.1x10-17	2.63x10-13	9.98x10-6	2.39x10-24	1.57x10-10	4.9x10-6	1.49x10-5	8.46x10-13	1.95x10-16	6.78x10-6	1.07x10-8	3.35x10-8	3.28x10-10	9.28x10-33	1.37x10-19	2.79x10-16	2.52x10-6	9x10-6	3.54x10-19	8.53x10-5	5.33x10-5	7.24x10-14	1.9x10-12
Social distancing index	3.26x10-20	3.93x10-12	3.35x10-13	9.33x10-13	1.67x10-5	6.38x10-24	2.52x10-10	2.18x10-5	6.66x10-5	3.89x10-12	1.39x10-16	1.47x10-8	7.74x10-9	6.93x10-9	1.03x10-10	1.26x10-35	2.32x10-17	4.11x10-17	2.12x10-6	8.02x10-5	9.05x10-19	6.65x10-4	6.64x10-5	2.36x10-14	7.34x10-9
Unemployment claims	1.92x10-20	7.45x10-11	1.17x10-12	1.89x10-11	1.23x10-5	4.66x10-24	4.25x10-11	2.74x10-4	2.53x10-4	4.01x10-10	5.13x10-16	2.03x10-7	7.66x10-9	4.18x10-7	9.27x10-10	8.65x10-32	4.03x10-17	1.28x10-15	1.3x10-4	6.26x10-4	5.65x10-17	2.07x10-5	7.04x10-5	5.4x10-13	2.94x10-8
Unemployment rate	3.54x10-20	3.41x10-14	1.38x10-16	3.67x10-14	9.95x10-11	1.82x10-24	3.76x10-8	1.19x10-4	4.31x10-5	3.77x10-12	8.61x10-16	8.06x10-15	5.91x10-9	8.29x10-10	6.07x10-15	2.27x10-37	6.29x10-20	2.06x10-13	1.23x10-4	1.94x10-3	2.29x10-20	1.93x10-1	1.05x10-8	3.77x10-19	1.57x10-11
% working from home	8.86x10-23	2.14x10-17	1.66x10-18	1.82x10-17	1.14x10-8	1.55x10-23	2.02x10-8	4.03x10-4	2.5x10-7	5.96x10-13	1.69x10-18	6.78x10-10	1.23x10-11	1.39x10-7	1.74x10-10	5.77x10-40	8.65x10-18	3.25x10-18	4.95x10-5	1.07x10-3	4.84x10-19	3.34x10-2	5.42x10-6	3.55x10-17	1.09x10-13
Active cases/1000 people	3.95x10-24	1.1x10-18	9.53x10-29	1.29x10-27	2.37x10-11	3.52x10-23	3.13x10-16	5.23x10-5	1.47x10-15	2.77x10-16	1.14x10-20	2.54x10-12	7.11x10-18	3.32x10-10	1.01x10-10	7.98x10-34	3.75x10-18	4.34x10-13	3.92x10-9	4.74x10-3	1.89x10-19	2.82x10-1	2.71x10-5	1.56x10-13	1.49x10-19
Testing capacity	2.45x10-21	5.62x10-11	3.8x10-14	7.49x10-14	3.43x10-5	1.27x10-25	5.89x10-16	5.84x10-4	3.27x10-6	4.5x10-9	1.95x10-16	1.16x10-10	1.03x10-13	2.15x10-12	2.81x10-9	2x10-38	1.48x10-17	2.19x10-12	1.65x10-4	5.28x10-3	2.62x10-22	4.98x10-2	8.89x10-11	3.07x10-13	1.48x10-11
Tests done/1000 people	4.36x10-24	2.92x10-17	1.54x10-30	2.89x10-21	8.05x10-10	9.61x10-22	3.39x10-7	1.15x10-3	1.68x10-13	1.64x10-15	1.16x10-18	4.7x10-8	2.62x10-15	8.01x10-6	1.1x10-8	6.31x10-32	8.07x10-17	5.23x10-11	1.25x10-3	1.24x10-2	7.43x10-16	1.01x10-1	1.98x10-4	3.18x10-13	1.22x10-18
Imported COVID cases	4.51x10-23	7.9x10-15	1.28x10-25	1.2x10-18	1.11x10-4	1.41x10-21	3.01x10-14	4.87x10-4	2.47x10-6	3.53x10-11	3.04x10-17	6.33x10-12	3.97x10-13	1.08x10-5	1.54x10-9	2.16x10-32	4.13x10-17	7.71x10-11	1.34x10-5	6.2x10-3	3.37x10-19	1.49x10-1	2.38x10-4	3.27x10-14	3.17x10-14
Retail	1.89x10-20	5.63x10-11	2.47x10-13	4.93x10-12	4.89x10-6	1.32x10-23	9.85x10-12	1.35x10-6	1.24x10-4	1.11x10-10	8.2x10-17	1.62x10-7	4.39x10-9	2.46x10-9	3.42x10-10	4.83x10-33	7.22x10-16	2.18x10-17	3.3x10-7	1.99x10-5	4.1x10-20	5.53x10-4	5.46x10-5	6.54x10-13	1.34x10-8
Grocery	1.31x10-19	4.87x10-13	4.11x10-13	5.22x10-14	1.37x10-6	2.22x10-24	1.21x10-10	3.16x10-6	2.9x10-6	5.35x10-15	2.83x10-17	5.74x10-7	4.24x10-9	1.55x10-10	1.67x10-11	1.42x10-40	1.32x10-14	9.77x10-20	2.74x10-6	7.63x10-6	1.87x10-20	1.64x10-4	4.68x10-6	1.04x10-13	4.04x10-11
Parks	2.18x10-20	5.83x10-11	1.51x10-16	4.35x10-11	4.58x10-7	3.73x10-22	2.52x10-7	9.51x10-4	4.42x10-5	6.53x10-7	9.95x10-18	1.11x10-7	1.85x10-10	3.81x10-5	1.78x10-7	8.74x10-30	1.89x10-13	1.17x10-17	7.71x10-4	3.79x10-2	2.29x10-15	1.46x10-1	1.13x10-4	1.73x10-11	1.48x10-8
Transit	2.05x10-19	4.91x10-13	4.16x10-14	6.51x10-14	7.84x10-9	2.83x10-25	1.37x10-11	1.49x10-6	2.93x10-5	1.65x10-14	7.73x10-17	2.86x10-10	5.36x10-10	7.56x10-12	1.44x10-14	1.28x10-37	1.81x10-18	2.38x10-20	4.47x10-6	1.5x10-5	7.77x10-22	2.73x10-5	4.2x10-7	1.9x10-16	7.61x10-11
Workplaces	8.09x10-22	3.69x10-15	3.2x10-15	7.47x10-18	1.54x10-13	6.9x10-26	6.14x10-9	2.24x10-5	5.15x10-7	5.81x10-17	3.12x10-17	1.23x10-12	2.94x10-10	2.3x10-11	3.39x10-17	1.28x10-39	1.4x10-24	5.27x10-20	1.42x10-5	9.31x10-6	5.15x10-24	7.56x10-3	1.63x10-8	7.85x10-20	7.46x10-13
Residential	1x10-20	4.24x10-13	3.33x10-13	6.29x10-16	1.12x10-10	6.44x10-26	1.65x10-9	5.95x10-6	7.9x10-6	2.85x10-13	3.78x10-17	9.26x10-11	3.24x10-9	1.34x10-12	2x10-16	1.37x10-37	3.3x10-22	2.52x10-19	1.19x10-5	8.77x10-6	4.29x10-25	3.63x10-3	7.06x10-9	1.69x10-18	4.68x10-10
Protest	NA	6.77x10-3	2.51x10-2	1.72x10-2	1.94x10-1	1.28x10-2	3.38x10-1	9.59x10-1	7.26x10-2	7.86x10-1	NA	2.11x10-2	3.04x10-1	1.52x10-2	6.56x10-3	6.14x10-4	3.47x10-2	8.58x10-3	1.01x10-2	1.57x10-1	2.75x10-4	1.5x10-3	2.31x10-1	5.07x10-3	1.67x10-1
Risk Factor	MT	NC	ND	NE	NH	NJ	NM	NV	NY	OH	OK	OR	PA	RI	SC	SD	TN	TX	UT	VA	VT	WA	WI	WV	WY
Miles/person	1.02x10-17	1.87x10-12	3.37x10-19	4.86x10-19	1.46x10-16	1.65x10-3	3.25x10-10	1.01x10-11	2.39x10-2	2.14x10-10	4.07x10-12	4.67x10-21	4.51x10-16	1.6x10-9	7.62x10-11	5.63x10-22	1.61x10-12	7.78x10-9	2.18x10-21	2.39x10-9	3.39x10-17	1.52x10-17	1.8x10-14	3.92x10-17	7.95x10-28
Population	7.72x10-17	3.31x10-12	1.05x10-19	1.57x10-19	1.32x10-17	3.96x10-4	5.06x10-11	2.95x10-11	1.24x10-2	1.04x10-12	4.61x10-13	6.04x10-21	1.14x10-17	3.63x10-11	5.91x10-10	1.81x10-21	1.09x10-11	3.79x10-8	3.53x10-19	2.15x10-11	1.26x10-18	1.25x10-21	1.03x10-17	6.02x10-17	2.49x10-27
% change in consumption	1.38x10-16	5.85x10-12	2.54x10-17	4.63x10-17	1.88x10-17	1.81x10-7	7.2x10-7	1.44x10-10	1.52x10-5	1.03x10-10	1.36x10-11	1.94x10-20	2.83x10-18	4.45x10-12	8.66x10-11	2.3x10-20	9.55x10-11	2.91x10-8	8.95x10-19	5.85x10-12	5.58x10-25	3.69x10-20	1.33x10-12	1.37x10-17	6.08x10-26
Social distancing index	1.1x10-15	8.52x10-10	6.67x10-19	1.13x10-15	2.43x10-15	1.18x10-5	1.13x10-8	2.25x10-10	1.97x10-3	1.21x10-11	2.14x10-11	8.07x10-18	4.75x10-18	1.8x10-12	2.04x10-8	5.04x10-18	6.93x10-10	2.38x10-7	4.94x10-16	2.79x10-11	4.28x10-23	1.97x10-25	4.4x10-15	1.75x10-15	1.69x10-26
Unemployment claims	2.77x10-15	2.93x10-8	5.58x10-18	8.83x10-16	2.15x10-15	3.29x10-5	2.1x10-7	5.97x10-9	6.63x10-5	3.01x10-9	3.4x10-10	2.12x10-16	3.92x10-16	1.06x10-9	4.96x10-8	2.85x10-18	7.28x10-9	6.22x10-7	3.28x10-14	4.61x10-9	1.23x10-29	1.17x10-24	3.48x10-14	2.56x10-15	1.96x10-26
Unemployment rate	1.53x10-15	1.57x10-12	1.04x10-20	2.9x10-22	1.3x10-23	3.1x10-4	1.15x10-16	7.72x10-10	2.87x10-2	2.67x10-17	8.69x10-11	3.09x10-19	8.06x10-20	5.57x10-16	5.47x10-9	1.09x10-22	3.25x10-11	1.24x10-7	6.26x10-18	1.4x10-14	6.04x10-18	4.86x10-18	1.13x10-20	3.29x10-16	4.04x10-28
% working from home	2.56x10-19	6.32x10-16	8.27x10-20	1.24x10-20	6.44x10-16	1.31x10-4	1.72x10-12	1.16x10-15	4.48x10-3	1.57x10-12	7.56x10-17	4.5x10-26	3.02x10-17	3.92x10-10	7.68x10-14	2.58x10-22	1.71x10-14	2.22x10-9	1.87x10-23	5.52x10-12	1.87x10-18	5.66x10-28	5.6x10-19	4.21x10-18	1.13x10-27
Active cases/1000 people	4.41x10-25	7.12x10-15	6.35x10-20	7.36x10-22	3.18x10-27	6.17x10-9	2.77x10-11	1.45x10-17	2.03x10-3	5x10-11	2.21x10-14	1.31x10-25	1.56x10-22	7.17x10-20	6.75x10-25	6.01x10-24	2.02x10-23	2.59x10-23	8.12x10-29	9.29x10-11	1.61x10-23	1.83x10-18	1.13x10-13	7.81x10-22	2.39x10-28
Testing capacity	1.92x10-16	1.56x10-9	2.87x10-20	1.9x10-21	1.1x10-18	3.39x10-5	1.54x10-16	2.3x10-12	8.37x10-4	3.28x10-9	1.41x10-11	6.49x10-19	2.08x10-16	9.74x10-10	6.74x10-10	7.91x10-22	6.9x10-10	2.27x10-7	5.31x10-16	1.44x10-14	6.7x10-28	1.21x10-17	5.96x10-20	2.22x10-17	1.03x10-26
Tests done/1000 people	2.5x10-24	2.89x10-14	2.25x10-19	2.84x10-17	6.67x10-15	1.23x10-3	3.88x10-8	1.9x10-15	1.89x10-2	2.37x10-9	3.28x10-13	6.01x10-24	1.3x10-15	3.69x10-9	7.78x10-20	2.12x10-21	2.06x10-24	1.74x10-19	6.32x10-27	1.3x10-8	1.29x10-17	9.67x10-17	9.18x10-13	1.15x10-19	5.17x10-28
Imported COVID cases	4.12x10-23	4.69x10-10	6.95x10-20	2.43x10-18	3.41x10-28	1.66x10-7	3.53x10-8	1.41x10-11	4.26x10-2	2.84x10-10	2.86x10-11	1.99x10-24	1.11x10-23	2.16x10-22	3.32x10-18	2.01x10-21	6.62x10-18	3.98x10-19	5.35x10-22	7.71x10-9	1.29x10-18	1.15x10-16	2.04x10-14	4.27x10-20	2.63x10-28
Retail	7.09x10-17	2.78x10-8	3.07x10-18	5.11x10-15	1.44x10-15	2.03x10-7	6.37x10-8	2.09x10-9	6.62x10-4	4.4x10-10	9.91x10-11	3.37x10-15	2.73x10-18	3.96x10-11	8.97x10-8	8.87x10-22	4.91x10-9	3.6x10-7	3.9x10-13	2.42x10-10	3.02x10-27	5.21x10-27	3.48x10-14	2.18x10-15	1.47x10-27
Grocery	1.58x10-17	1.43x10-12	1.14x10-19	5.41x10-17	1.76x10-17	7.14x10-7	5.48x10-11	1.39x10-10	8.39x10-5	1.42x10-13	1.6x10-8	2.21x10-20	2.78x10-18	3.52x10-12	1.7x10-9	1.21x10-19	2.04x10-10	1.98x10-8	2.77x10-16	2.16x10-12	1.6x10-26	6.76x10-22	3.12x10-17	1.59x10-16	3.38x10-26
Parks	3.15x10-21	1.01x10-8	1.49x10-18	9.93x10-17	3.33x10-15	1.64x10-3	2.47x10-8	9x10-9	4.96x10-3	1.82x10-8	4.29x10-7	2.76x10-22	3.86x10-15	4.26x10-9	2.45x10-8	1.82x10-20	6.14x10-11	3x10-8	4.76x10-22	5.53x10-7	9.07x10-18	5.67x10-16	2.21x10-10	9.61x10-15	3.56x10-27
Transit	3.75x10-19	1.15x10-11	6.82x10-19	1.7x10-19	2.73x10-16	1.31x10-6	7.54x10-9	9.4x10-11	2.55x10-3	5.76x10-13	2.11x10-15	3.45x10-19	3.83x10-20	2.79x10-13	1.3x10-9	5.19x10-20	5.31x10-10	5.98x10-8	3.76x10-16	3.14x10-14	2.06x10-22	3.83x10-29	5x10-20	4.17x10-17	9.97x10-27
Workplaces	2.18x10-16	8.95x10-18	2.89x10-20	2.62x10-23	1.56x10-19	2.5x10-7	1.96x10-12	6.56x10-12	1.89x10-3	8.34x10-16	1.89x10-19	4.88x10-24	5.1x10-20	1.03x10-12	1.44x10-11	6.71x10-23	2.55x10-12	8.38x10-9	7.78x10-20	2.61x10-16	1.15x10-21	1.7x10-27	4.77x10-29	1.15x10-17	2.42x10-27
Residential	7.66x10-15	2.05x10-14	2.18x10-18	4.7x10-21	1.5x10-19	1.96x10-9	1.44x10-11	5.73x10-11	2.27x10-4	7.43x10-13	2.99x10-17	2.03x10-19	3.78x10-20	1.62x10-13	5.84x10-10	3.13x10-20	6.76x10-10	5.87x10-8	9.66x10-16	3.29x10-15	7.41x10-25	1.65x10-27	5.78x10-25	3.16x10-16	7.93x10-26
Protest	9.7x10-2	2.33x10-3	3.55x10-1	3.9x10-3	1.87x10-1	7.43x10-3	1.44x10-1	8.37x10-3	3.9x10-1	2.08x10-3	4.17x10-2	5.11x10-5	1.44x10-1	7.06x10-2	1.93x10-2	3.24x10-3	5.5x10-3	1.69x10-4	5.76x10-1	1.16x10-2	NA	6.12x10-3	2.55x10-1	2.62x10-2	5.34x10-1
