# Supplementary material for: Causal Analysis of Health Interventions and Environments for Influencing the Spread of COVID-19 in the United States of America
Source: Frontiers journal article supplement (doi:10.3389/fams.2020.611805), 2021-01-24
Supplement: Table_4.XLSX [file Table_4.XLSX]

## Sheet: Table S4
Table S4. Values of statistics for testing 18 temporal potential causes of the number of deaths of COVID-19 across 50 states in the US.
Risk Factor	AK	AL	AR	AZ	CA	CO	CT	DE	FL	GA	HI	IA	ID	IL	IN	KS	KY	LA	MA	MD	ME	MI	MN	MO	MS
Miles/person	119.79	76.58	99.47	75.77	33.06	125.09	26.67	11.06	22.01	54.56	81.66	37.6	46.55	21.99	40.64	238.97	103.13	54.85	10.94	6.37	91.31	2.2	16.26	74.43	61.73
Population	115.95	72.03	79.71	68.38	31.02	136.4	33.02	13.9	19.83	59.85	84.73	44.5	43.93	30.7	51.74	268.83	118.68	75.51	16.08	10.23	101.97	3.29	22.38	83.78	54.8
% change in consumption	116.44	72.13	92	62.91	20.73	143.07	46.48	22.59	19.86	59.8	83.48	21.58	36.81	33.47	44.61	223.05	105.72	82.43	23.79	20.96	102.85	16.19	17.19	66.62	57.82
Social distancing index	110.56	55.91	62.39	59.53	19.63	139.51	45.3	19.3	16.71	55.79	84.49	35.43	37.59	37.17	47.48	254.66	89.73	88.13	24.18	16.33	99.88	12.01	16.73	69.72	37.1
Unemployment claims	112.31	48.35	59.04	51.71	20.28	140.64	49.77	13.93	13.97	44.05	80.65	29.36	37.62	27.7	42.06	212.9	88.07	77.98	15.37	12.14	87.17	19.15	16.61	61.16	33.83
Unemployment rate	110.3	68.7	84.4	68.28	47.51	144.07	33.26	15.67	17.62	55.86	79.14	72.65	38.26	42.27	73.46	275.12	108.25	63.76	15.49	9.91	111.74	1.71	36.24	102.66	52.32
% working from home	130.65	90.11	97.82	90.22	35.98	136.33	34.71	13.14	28.86	60.73	97.93	42.82	54.18	30.19	46.18	307.43	92.74	95.88	17.38	11.08	101.86	4.6	22.06	88.57	65.49
Active cases/1000 people	141.8	99.26	182.76	171.4	51.13	133.41	82.09	17.42	77.32	82.15	114.02	57	97.08	44.52	47.55	234.51	95.3	61.75	38.73	8.19	104.86	1.17	18.61	64.52	105.63
Testing capacity	119.18	49.06	68.33	66.32	18.1	153.96	80.24	12.38	23.15	38.2	83.49	47.2	67.52	57.33	39.37	287.98	91.09	57.44	14.87	7.98	126.86	3.9	47.86	62.68	52.47
Tests done/1000 people	141.44	89.15	200.22	118.03	42.34	121.94	28.21	11.01	64.13	77.01	99.11	32.72	78.38	21.2	36.12	214.32	85.99	49.24	10.79	6.39	79.57	2.72	14.47	62.59	98.94
Imported COVID cases	133.03	72.79	154.26	98.57	15.65	120.65	69.04	12.75	23.76	50.12	89.04	54.62	63.66	20.55	40.83	219.18	88	48.26	20.16	7.68	103.02	2.1	14.1	68.82	68.9
Retail	112.36	49.06	63.21	55.17	22.27	136.91	53.52	25.49	15.43	47.23	86.06	29.87	38.99	39.64	44.5	226.06	79.55	90.05	28.34	19.26	109.81	12.38	17.14	60.65	35.68
Grocery	106.04	61.44	61.84	67.31	25.06	143.33	47.12	23.57	23.41	73.65	89.26	27.01	39.08	46.4	52.11	315.36	71.28	106.99	23.61	21.31	112.39	14.84	22.38	65.64	49.89
Parks	111.89	48.97	84.14	49.59	27.5	125.18	28.88	11.4	17.57	26.7	92.44	30.73	47.02	17.88	29.65	192.76	63.93	91.94	11.74	4.38	76.32	2.13	15.63	52.07	35.44
Transit	104.61	61.42	68.08	66.7	36.88	150.95	52.67	25.27	18.43	70.5	86.24	44.95	44.28	54.06	71.03	278.11	97.56	111.6	22.53	19.86	123.1	18.56	27.71	83.56	48.29
Workplaces	122.96	74.96	75.27	92.93	64.35	156.27	37.52	19.24	27.23	86.75	88.96	58.92	45.81	51.21	88.59	303.01	145.32	108.99	20.03	20.88	140.83	7.3	35.2	107.7	60.3
Residential	114.47	61.82	62.4	79.76	47.21	156.54	40.69	22.15	21.23	62.7	88.38	47.76	39.74	58.58	83.31	277.76	125.83	103.94	20.41	21.01	150.02	8.7	37.17	97.93	43.77
Protest	NA	10.07	8.79	6.88	1.79	8.33	0.98	0.0034	3.61	0.08	NA	6.38	1.31	7.2	9.94	24.1	5.17	9.33	8.36	2.39	25.71	12.98	1.58	9.9	2.62
Risk Factor	MT	NC	ND	NE	NH	NJ	NM	NV	NY	OH	OK	OR	PA	RI	SC	SD	TN	TX	UT	VA	VT	WA	WI	WV	WY
Miles/person	92.37	57.7	104.9	101.54	84.13	10.19	44.64	53.36	5.19	45.64	55.82	116.43	80.92	40.68	48.18	124.66	58.15	36.89	119.58	39.73	88.71	88.81	70.24	88.15	178.03
Population	86.24	56.2	108.78	105.14	91.33	13.01	49.29	50.61	6.39	59.29	61.59	115.57	91.88	50.05	43.1	120.64	53.16	33.18	102.86	51.42	98.84	117.56	91.94	86.87	173.29
% change in consumption	84.51	54.73	91.03	87.53	90.25	29.36	26.51	46.62	19.83	47.45	52.68	111.73	96.18	55.43	47.86	112.08	47.65	33.8	99.92	54.77	149.03	106.88	58.59	91.33	160.35
Social distancing index	78.44	42.21	102.66	78.17	75.97	20.25	36.05	45.51	9.87	52.89	51.52	92.69	94.57	57.81	34.62	94.8	42.74	28.97	80.75	50.76	133.22	147.02	74.2	77	165.46
Unemployment claims	75.77	33.78	95.81	78.87	76.32	18.1	29.28	37.55	16.72	39.18	44.55	82.93	81.33	41.67	32.56	96.57	37.07	26.81	68.81	38.16	191.8	140.8	68.42	75.91	164.86
Unemployment rate	77.48	58.16	116.62	126.05	136.94	13.5	84.95	42.48	4.87	89.19	47.96	102.82	107.45	80.11	37.73	130.42	50.37	30.45	93.86	71.03	93.97	92.15	113.52	81.85	180.88
% working from home	103.9	79.74	109.58	113.39	79.79	15.25	58.03	78.09	8.3	58.22	86.3	157.57	88.94	44.11	66.25	127.38	70.46	39.89	136.18	54.92	97.61	168.29	100.95	94.95	176.57
Active cases/1000 people	149.92	72.84	110.46	122.85	168.19	37.07	50.82	91.03	9.82	49.28	69.91	153.52	128.43	107.49	147.42	140.83	135.38	134.24	183.87	47.72	136.71	95.04	65.2	122.87	183.11
Testing capacity	83.53	40.75	113.16	119.63	98.96	18.04	84.07	57.21	11.56	38.97	52.59	100.49	83.18	41.88	42.78	123.48	42.75	29.07	80.54	70.95	175.21	89.48	108.08	89.86	167.48
Tests done/1000 people	143.47	68.93	106.24	89.01	73.11	10.77	33.16	76.67	5.62	39.76	62.5	139.45	77.86	38.67	107.23	120.11	143.61	104.65	166.24	35.71	91.65	83.5	59.58	106.29	179.84
Imported COVID cases	133.35	43.66	110.16	96.51	177.12	29.54	33.38	52.51	4.17	44.94	50.78	143.45	137.77	126.83	95.41	120.29	93.42	102.02	124.39	36.94	98.76	83	69.9	109.5	182.71
Retail	86.49	33.9	97.72	73.86	77.47	29.09	32.02	40.06	12.03	43.85	47.63	74.96	96.29	49.83	31.19	123.09	38.01	28.04	62.04	45.33	169.17	160.07	68.42	76.37	175.46
Grocery	91.03	58.4	108.5	87.07	90.45	26.31	49.08	46.71	16.23	64.64	35.25	111.3	96.23	56.05	40.53	106.64	45.75	34.69	82.45	57.37	162.59	119.53	88.61	83.97	162.68
Parks	118.34	36.27	100.05	85.27	75.07	10.21	34.22	36.57	8.1	34.91	27.68	125.99	74.74	38.33	34.2	112.86	48.76	33.72	124.79	27.08	92.72	78.51	45.53	72.16	171.81
Transit	102.67	52.97	102.59	104.88	82.28	24.99	37.01	47.69	9.38	60.87	76.56	102.48	109.86	62.75	41.18	109.41	43.39	32.13	81.55	68.78	127.69	178.53	108.65	87.97	167.6
Workplaces	83.15	92.37	113.13	134.46	105.15	28.64	57.68	54.48	9.96	79.04	104.86	140.2	108.93	59.28	52.4	132.13	56.94	36.72	107.73	82.42	121.77	164.18	184.73	91.86	173.41
Residential	72.88	69.89	98.81	116.6	105.27	39.76	52.49	48.93	14.19	60.2	89.08	104.15	109.91	64.22	43.13	111.07	42.8	32.17	78.81	75.11	147.97	164.31	147.99	81.96	159.3
Protest	3.67	12.55	1.19	12.7	2.04	8.98	2.47	10.28	0.77	12.5	5.1	25.13	2.3	4.54	7.13	39.72	9.94	21.26	0.33	7.72	NA	9.51	1.39	7.89	0.49
