# Supplementary material for: Causal Analysis of Health Interventions and Environments for Influencing the Spread of COVID-19 in the United States of America
Source: Frontiers journal article supplement (doi:10.3389/fams.2020.611805), 2021-01-24
Supplement: Table_5.XLSX [file Table_5.XLSX]

## Sheet: Table S6
Table S5. Values of statistics for testing COVID-19 new case potential causes of six Google mobility indexes across 50 states in the US.
Google Mobility Index	AK	AL	AR	AZ	CA	CO	CT	DE	FL	GA	HI	IA	ID	IL	IN	KS	KY	LA	MA	MD	ME	MI	MN	MO	MS
Retail	6.82	10.55	12.27	6.39	1.94	2.61	8.14	2.72	3.09	6.86	4.8	5.95	4.74	3.86	4.43	15.35	5.91	8.28	3.8	4.95	5.82	7.51	5.19	11.73	14.43
Grocery	8.33	41.26	30.22	10.43	6.97	10.61	30.04	9.97	11.82	31.58	9.76	32.06	9.66	27.89	23.5	26.53	30.62	32.91	36.25	18.85	17.5	25.04	24.89	25.35	38.76
Parks	7	35.14	38.08	29.79	8.94	17.79	53.85	18.93	8.76	46.13	7.8	30.47	15.46	28.69	37.14	36.44	43.52	36.56	27.88	36.02	9.32	10.76	36.24	26.13	29.04
Transit	4.27	13.19	8.08	3.25	0	0.58	0.54	4.23	1.91	0.5	3.95	10.27	6.75	2.41	9.73	13.88	6.72	4.83	0.12	1.54	6.75	5.29	2.31	6.48	9.86
Workplaces	22.73	11.51	12.73	6.52	6.69	5.61	10.31	16.17	6.82	2.78	6.31	15.44	7.01	12.12	9.81	2.79	4.73	9.83	9.49	10.91	18.71	14.63	16.82	7.44	5.58
Residential	21.56	10.89	14.58	5.38	5.01	4.52	9.88	16.64	6.82	2.99	8.95	11.37	9.72	8.86	10.24	7.65	11.9	13.51	9.15	9.99	15.41	16.28	11.99	12.97	6.76
Google Mobility Index	MT	NC	ND	NE	NH	NJ	NM	NV	NY	OH	OK	OR	PA	RI	SC	SD	TN	TX	UT	VA	VT	WA	WI	WV	WY
Retail	6.59	5.15	7.2	11.23	7.56	9.89	6.59	2.51	9.28	7.14	9.41	3.87	8.68	10.47	6.07	7.39	7.25	5.94	8.15	2.23	13.51	3.73	3.76	6.06	4.86
Grocery	12.62	20.1	32.52	44.5	23.04	43.18	15.27	9.7	49.32	26.03	27.64	12.36	21.26	25.21	25.6	12.83	37.18	15.18	15.73	16.37	24.23	13.61	18.29	22.59	5.9
Parks	7.48	57.81	17.17	18.33	8.95	24.79	14.83	9.56	36.41	46.58	18.24	22.81	29.83	23.1	26.71	9.07	35.74	24.76	11.62	27.58	8.96	20.41	43.2	46.4	6.01
Transit	15.35	1.68	5.24	12.26	7.01	4.53	3.28	1.02	3.44	6.03	13.5	3.07	0.14	4.48	9.76	4.36	6.01	1.41	0.5	1.64	14.51	6.4	8.54	12.55	10.13
Workplaces	7.46	5.73	13.97	5.55	14.19	19.63	10.89	1.68	13.53	3.98	9.54	9.61	6.95	19.28	9.03	16.32	7.39	7.58	7.23	8.35	18.86	22.44	12.13	9.69	10.18
Residential	10.38	6.43	11.74	4.25	16.2	28.23	7.25	5.31	21.29	7.86	13.82	10.04	10.83	19.27	8.87	10.6	11.29	5.83	8.07	10.14	22.89	15.5	10.49	16.99	8.26
